1 **Fitness of reciprocal F<sub>1</sub> hybrids between**  
2 ***Rhinanthus minor* and *Rhinanthus major* under**  
3 **controlled conditions and in the field**

4

5

6 Renate A. Wesselingh<sup>1\*</sup>, Šárka Hořčicová<sup>2</sup> and Khaled Mirzaei<sup>1</sup>

7 <sup>1</sup> Biodiversity Research Centre, Earth and Life Institute, UCLouvain, Croix du Sud 4 box L7.07.04,  
8 B-1348 Louvain-la-Neuve, Belgium

9 <sup>2</sup> Department of Botany, Faculty of Science, University of South Bohemia, CZ-370 05, České  
10 Budějovice, Czech Republic

11

12 \* Corresponding author

13 E-mail: [renate.wesselingh@uclouvain.be](mailto:renate.wesselingh@uclouvain.be)

14 phone: +32 10 473447

15 fax: +32 10 473490

16

17

18 Short running title: F<sub>1</sub> hybrid fitness in *Rhinanthus*

19

20

## 21 **Abstract**

22 The performance of first-generation hybrids determines to a large extent the long-term outcome of  
23 hybridization in natural populations. F<sub>1</sub> hybrids can facilitate further gene flow between the two  
24 parental species, especially in animal-pollinated flowering plants. We studied the performance of  
25 reciprocal F<sub>1</sub> hybrids between *Rhinanthus minor* and *R. major*, two hemiparasitic, annual, self-  
26 compatible plant species, from seed germination to seed production under controlled conditions and  
27 in the field. We sowed seeds with known ancestry outdoors before winter and followed the  
28 complete life cycle until plant death in July the following season. While germination under  
29 laboratory conditions was much lower for the F<sub>1</sub> hybrid formed on *R. major* compared to the  
30 reciprocal hybrid formed on *R. minor*, this difference disappeared under field conditions, pointing at  
31 an artefact caused by the experimental conditions during germination in the lab rather than at an  
32 intrinsic genetic incompatibility. Both F<sub>1</sub> hybrids performed as well as or sometimes better than *R.*  
33 *minor*, which had a higher fitness than *R. major* in one of the two years in the greenhouse and in the  
34 field transplant experiment. The results confirm findings from naturally mixed populations, where  
35 F<sub>1</sub> hybrids appear as soon as the two species meet and which leads to extensive advanced-hybrid  
36 formation and introgression in subsequent generations.

37

38 *Keywords:* emergence; germination; greenhouse; field transplant; hybridization; seed production;  
39 stratification, survival.

40

## 41 Introduction

42 Speciation without a change in chromosome numbers, homoploid speciation, is a slow process that  
43 initially leaves the door wide open for mating and offspring production with sister species. This is  
44 why isolation, i.e. allopatry or some other form of prezygotic isolation, such as divergence in  
45 mating preferences, host species, phenology or pollinator guild, is generally considered necessary to  
46 complete the speciation process (Abbott *et al.*, 2013). When nascent sister species meet in sympatry  
47 and prezygotic isolation is not complete, natural hybridization can occur. The first step in  
48 hybridization is the formation of hybrid offspring by interspecific sperm or pollen transfer and  
49 subsequent fertilization. If this leads to the production of at least partly viable first-generation or  $F_1$   
50 hybrids, the outcome of hybridization will strongly depend on the fitness of these hybrids. A  
51 strongly reduced fitness for  $F_1$  hybrids precludes any advanced-hybrid formation or introgression  
52 and can be a severe bottleneck. But  $F_1$  hybrids, both intra- and interspecific, are also known to  
53 exhibit heterosis (Birchler *et al.*, 2010) or transgressive trait values, beyond the expected mid-parent  
54 value (Rieseberg *et al.*, 1999; Johnston *et al.*, 2004). Once established, even just a few  $F_1$  hybrids  
55 can serve as a bridge to the formation of advanced hybrids and introgression (Arnold *et al.*, 2012),  
56 often facilitating pollen transport between the parental species in animal-pollinated angiosperms  
57 (Leebens-Mack & Milligan, 1998; Emms & Arnold, 2000). Knowledge about  $F_1$  fitness is thus  
58 crucial for understanding the composition of mixed populations and to predict their future.

59 Hybrid formation and fitness in flowering plants can vary depending on which species is the  
60 maternal parent and lead to asymmetries in fitness between the reciprocal crosses, likely to be  
61 caused by Dobzhansky-Muller incompatibilities (Tiffin *et al.*, 2001). The asymmetry in postmating  
62 reproductive isolation has been called Darwin's corollary to Haldane's rule (Turelli & Moyle,  
63 2007), and interactions between nucleus and cytoplasm, between gametophyte (pollen) and  
64 sporophyte (stigma and style), and within the triploid endosperm are common causes of  
65 asymmetries in reproductive isolation in angiosperms (Turelli & Moyle, 2007).

66 While asymmetries in hybrid fitness are often caused by intrinsic factors, hybrid fitness can  
67 also be dependent on the environment. Hybrids can have a relatively low fitness in the parental  
68 habitats, but perform better in alternative, unique habitats (Cruzan & Arnold, 1993; Gramlich *et al.*,  
69 2016). This can lead to homoploid hybrid speciation if hybrids are (spatially) isolated from their  
70 parental lines (Arnold, 1993; Abbott *et al.*, 2013). By growing plants under optimal (greenhouse or  
71 growth room) conditions, excluding environmental factors, intrinsic genetic incompatibilities  
72 between the parental genomes leading to poor hybrid performance can be identified, as well as  
73 possible asymmetries in performance between reciprocal  $F_1$  hybrids. Field transplants of hybrids of  
74 known descent and the parental species allow for the quantification of hybrid fitness (Arnold &  
75 Hodges, 1995; Martin *et al.*, 2006; Gramlich & Hörandl, 2016; Favre *et al.*, 2017). Using genetic  
76 tools, the prevalence of hybrids in different life stages (seed, seedling, juvenile, adult) can be  
77 determined in naturally mixed populations to see if it decreases as a result of consistent selection  
78 against hybrids (Cornman *et al.*, 2004; Lindtke *et al.*, 2014; Hipperson *et al.*, 2016). Experiments in  
79 which environmental factors are independently varied in a controlled fashion can then help to  
80 identify the factors directly responsible for fitness differences (Johnston *et al.*, 2001; Favre &  
81 Karrenberg, 2011; Hipperson *et al.*, 2016).

82 Although knowledge on the fitness of hybrids is crucial for understanding the possible  
83 outcomes of hybridization, relatively few studies (Emms & Arnold, 1997; Burke *et al.*, 1998;  
84 Kimball *et al.*, 2008; Favre & Karrenberg, 2011; Lepais *et al.*, 2013; Favre *et al.*, 2017) have  
85 compared the performance of reciprocal  $F_1$  hybrids under both controlled conditions and in the field.  
86 Some of these studies used seedlings, rooted cuttings or rhizomes for field transplants. This gives  
87 the advantage of being able to replicate the same genotype in several environments, but the  
88 downside is that part of the life cycle, from seed to established young plant, is missing. This can be  
89 justified for long-lived species, but for annual species, including the seed stage is crucial in  
90 understanding local adaptation (Postma & Ågren, 2018).

91 Our study system comprises two annual hemiparasitic plant species, *Rhinanthus minor* L. and  
92 *Rhinanthus major* Ehrh. (Orobanchaceae). They are both pollinated by bumblebees (Kwak, 1978;  
93 Natalis & Wesselingh, 2012a) and are known to readily hybridize in nature, the hybrid has been  
94 described as *Rhinanthus* × *fallax* (Wimm. & Grab.) Chabert (Kwak, 1980). We have studied the  
95 composition of mixed populations (Ducarme *et al.*, 2010), possible prezygotic barriers such as  
96 bumblebee preference and constancy (Natalis & Wesselingh, 2012a, 2013) and pollen tube growth  
97 rates (Natalis & Wesselingh, 2012b). Hybrid seed production after hand pollination with  
98 heterospecific pollen is known to be lower on *R. major* than on *R. minor* (Kwak, 1979; Campion-  
99 Bourget, 1980a; b; Ducarme & Wesselingh, 2013), and both species produce less hybrid seeds than  
100 expected after pollination with a 50:50 pollen mix (Natalis & Wesselingh, 2012b). Despite the  
101 wealth of knowledge on hybridisation in this species pair, no study has ever attempted to quantify  
102 hybrid fitness in the field, apart from one study (Kwak, 1980) that looked at the number of seeds  
103 per flower only, without considering plant size and total seed production, the latter being the fitness  
104 measure that really counts.

105 *Rhinanthus* seeds can only germinate after several weeks of cold stratification (Westbury,  
106 2004; ter Borg, 2005), which limits germination to early spring. Under laboratory conditions, with  
107 seeds placed on moist filter paper in petri dishes in a refrigerator at  $\pm 5^{\circ}\text{C}$ , a strong difference in  
108 germination rate is repeatedly observed between the reciprocal  $F_1$  hybrids. Hybrids formed on *R.*  
109 *major* ( $F_{1m}$  hybrids) germinate at rates between 5 and 30%, while  $F_{1m}$  hybrids, which have *R. minor* as  
110 the maternal parent, germinate as well as or better than *R. minor*, with germination percentages  
111 close to 100% (Kwak, 1979; Campion-Bourget, 1980a; Natalis & Wesselingh, 2012b; Ducarme &  
112 Wesselingh, 2013). However, it has never been tested if this difference in germination rate also  
113 occurs under field conditions.

114 We therefore set out to record the process of germination of hybrid seeds in the laboratory and  
115 to compare performance along the complete life cycle (germination/emergence, survival, seed

116 production) of reciprocal F<sub>1</sub> hybrids and the parental lines under both greenhouse and field  
117 conditions.

118 In contrast to other study systems, in which the parental species have distinct ecological niches  
119 (Campbell *et al.*, 1997; Favre & Karrenberg, 2011; Cahenzli *et al.*, 2018) and transplants can be  
120 performed in habitats that are clearly attributed as typical for one of the two parental species, our  
121 two study species can co-occur in a range of different grassland types, and only subtle differences in  
122 nutrient status seem to determine which of the two will become dominant (Ducarme & Wesselingh,  
123 2010). We therefore included a fertilizer addition treatment in the field experiment. It is known that  
124 in nutrient-rich grasslands, where plant growth is very vigorous, *Rhinanthus* seedlings have  
125 difficulties establishing themselves in the dense sward due to a lack of light at ground level (Těšitel  
126 *et al.*, 2011), but the surviving parasites can profit from the increased nutrient availability for their  
127 host by producing more biomass, flowers and seeds (Mudrak *et al.*, 2013). We wanted to investigate  
128 the role of grassland nutrient status in determining the relative fitness of the parental species and  
129 their hybrids.

130 We aimed at answering the following questions:

- 131 1) Are there differences in performance (germination/emergence, survival, seed production)  
132 between the reciprocal F<sub>1</sub> hybrids and between hybrids and the parental lines under the conditions  
133 used in the laboratory and in the field?
- 134 2) Is the relative performance of the parental and hybrid classes different between the laboratory  
135 and the outdoor conditions?
- 136 3) Is there an influence of fertilizer addition on the relative performance of the parental and hybrid  
137 classes in the field?

## 138 **Materials and methods**

### 139 **Study species**

140 *Rhinanthus minor* L. and *Rhinanthus major* Ehrh. (Orobanchaceae) are hemiparasitic annual plants  
141 occurring in grasslands. Like the other species in the genus *Rhinanthus* they are capable of  
142 parasitising a wide range of host species in the Poaceae and Fabaceae. *Rhinanthus major* (synonym  
143 *R. angustifolius* C.C. Gmel) is distributed throughout temperate and boreal/alpine Europe, ranging  
144 from central Scandinavia to Italy and from France to Russia (von Soó & Webb, 1972). The range of  
145 *Rhinanthus minor* overlaps with that of *R. major* and extends further out to the west (the British  
146 Isles, Iceland, Greenland and North America), to the north of Scandinavia and to the south (Spain,  
147 Corsica, Italy, Greece). All *Rhinanthus* species produce seeds in summer, which stay dormant in the  
148 soil until after cold stratification (ter Borg, 2005). Germination in temperate regions starts in  
149 February-March and seedlings emerge shortly after. Flowering usually starts in May in the vernal  
150 ecotype of both species (von Soó & Webb, 1972), which is adapted to hay making by flowering  
151 early and at a relatively small size. By early July most seeds have ripened and capsules dehisce. The  
152 heavy seeds (2-3 mg: Westbury, 2004) fall out of the capsule when the dead stalks break or are  
153 mown, but they can be dispersed over longer distances by mowing machinery (Strykstra *et al.*,  
154 1996) or in the hay itself (Vrancken *et al.*, 2012).

## 155 **Hybrid production**

156 The general procedure to produce *Rhinanthus* hybrids in our lab is to collect seeds in pure  
157 populations in July, keep them dry and cool in order to prolong seed longevity until October-  
158 November and germinate the seeds in petri dishes in a refrigerator ( $\pm 5-7^{\circ}\text{C}$ ). The emerging  
159 seedlings are then planted in pots with host plants (*Trifolium repens*) in a heated greenhouse in  
160 January-February and crosses are made by hand pollination when plants start to flower, which is  
161 around two months after planting. The capsules are harvested when dry ( $\pm 3$  weeks after  
162 pollination) and the number of seeds per capsule is counted. The dry seeds are then stored in closed  
163 recipients in a refrigerator until sowing in autumn for the next greenhouse generation. The specific  
164 details for each experiment are given below.

165 For the transplant experiment in 2013–2014, seeds were collected in pure populations of each  
166 species. The source populations for *R. minor* were the nature reserve Houst-Darquenne (July 2010)  
167 and the local population on the campus of UCLouvain (July 2011), which had been sown in 2003  
168 using seeds from this nature reserve. For *R. major*, seeds were collected in the nature reserve Doode  
169 Bemde in July 2010 and in a local population on the UCLouvain campus in July 2012, which had  
170 been sown in 2003 using seeds collected in the Doode Bemde population.

171 Fifty seeds per population were put in petri-dishes on moist filter paper on 31 October 2012  
172 and stored in a refrigerator at around 5°C. Germination started after  $\pm$  4 weeks for the seeds  
173 collected in 2010 and 2011, and after 8 weeks for the seeds collected in 2012. The seedlings were  
174 kept in the refrigerator until the cotyledons emerged from the seed coat and planted in pots with a  
175 single host plant (*Trifolium repens*), which had been sown on 24 October 2012 in a heated  
176 greenhouse in 0.75 L square pots (10 x 10 cm surface area). Each corner of a pot received one  
177 seedling, so a pot was occupied by maximum 4 plants, and pots only contained plants from the  
178 same population. Flowering started in the greenhouse on 12 March 2013, and crosses were made by  
179 hand pollination preceded by emasculation of the closed bud (only needed on *R. minor*) to prevent  
180 autonomous self-pollination (Ducarme & Wesselingh, 2013). We produced hybrid seeds in both  
181 directions as well as pure seeds by performing intraspecific crosses (including selfing). After the  
182 fruits ripened and started to dehisce in March-May 2013, the capsules were harvested and left to dry  
183 in 24-well plates. After counting the number of seeds produced per fruit, the closed plates were kept  
184 in a refrigerator until the start of the experiments.

### 185 **Germination under controlled conditions**

186 The seeds that were produced in the greenhouse in spring 2013 and that were not used in the field  
187 transplants (see Performance in the field) were put in small petri dishes on moist filter paper (one  
188 dish per cross) and placed in a refrigerator at 5°C on 23 October 2013 for the production of F<sub>1</sub> and F<sub>2</sub>  
189 and backcross hybrids in the greenhouse. The number of seeds per cross ranged from 1 to 11, with



190 an average of 5.2 seeds per cross, with in total 72 *R. major* seeds, 77 *R. minor* seeds, 106  $F_{1m}$  hybrid  
191 seeds and 106  $F_{1a}$  hybrid seeds. From 29 November 2013 onwards, germination was checked at least  
192 once a week until 5 March 2014. Seeds with a protruding radicle were considered as germinating  
193 and put to one side in each petri dish to facilitate subsequent checks.

## 194 **Greenhouse performance**

195 Mortality in the greenhouse is generally very low (we typically lose less than 5% of the seedlings  
196 after planting) and pollination is done manually and with different pollen sources, leading to  
197 differences among plants in seed production. We therefore scored performance in the greenhouse  
198 using flower production, which is a very good proxy of plant biomass (Ducarme & Wesselingh,  
199 2010) and seed production under natural pollination (see Performance in the field) and hence fitness  
200 in *Rhinanthus*. We recorded flower production for the parents of the hybrids (14 *R. minor* and 11 *R.*  
201 *major*) in the greenhouse in spring 2013 together with a group of simultaneously grown  $F_1$  hybrids  
202 (24  $F_{1m}$  and 12  $F_{1a}$ ) that had been produced in the greenhouse in the previous year.

203 Since all plant growing activities were moved to a new greenhouse in January 2014, we  
204 repeated the experiment in spring 2013 with the seedlings from the germination experiment (see  
205 Germination under controlled conditions) that were grown in the new greenhouse to produce new  
206 hybrids, but otherwise using the same methods. This time we had 64 *R. minor* and 59 *R. major*  
207 plants, issued from intraspecific crosses between the parents, plus 88  $F_{1m}$  and 15  $F_{1a}$  hybrids. In  
208 both greenhouses, the temperature was regulated around 20°C in the day and 18°C at night by  
209 central heating to increase the temperature and opening the windows to decrease it. The new  
210 greenhouse also regulated relative humidity (at 60%) and used LED lights in the photosynthetically  
211 active spectrum for illumination (16h daylength), while in the old greenhouse, this was done with  
212 mercury vapour lamps.

## 213 **Performance in the field**

214 In December 2013, 8 experimental plots of 100 × 50 cm each were set up in a grassland on the  
215 UCLouvain campus that had been a lawn until 2009, when the area had been fenced and partly  
216 sown with seeds of both *Rhinanthus* species at one end for observations on bumblebee behaviour in  
217 2010 (Natalis & Wesselingh, 2013). Although on loamy soil, the vegetation in this grassland is not  
218 very productive, due to decades of regular mowing without any fertilizer addition, and at the time of  
219 our experiment, *Festuca rubra* L. was the dominant grass species. We used a total of 1152 seeds  
220 (144 per plot) that were produced in the greenhouse (see Hybrid production), of which 188 were *R.*  
221 *major*, 368 *R. minor*, 240  $F_{1a}$  hybrids and 356  $F_{1m}$  hybrids. We made a design that distributed pairs of  
222 seeds from the same cross randomly over four plots. Six 96-well plates (8 × 12 wells per plate, 1.5  
223 plates per pair of plots) were filled with moistened white sand and two seeds of the same cross were  
224 placed in the sand in each well. The plates were then kept in the refrigerator until planting in the  
225 field plots one week later, on 10-11 December 2013. In order to plant the seeds, we placed a grid,  
226 made of a piece of fencing with a square 13-mm mesh, in each plot and single seeds were sown  
227 5.25 cm apart (4 cells in the grid) in 8 rows and 18 columns by making a 1-cm deep hole in the  
228 middle of the grid cell with a wooden stick and dropping the seed in the hole with tweezers. A  
229 wooden toothpick was then stuck in the ground in the top left corner of the grid cell at 9 mm  
230 distance from the seed in the middle of the cell to facilitate localisation of the seedlings in spring.  
231 The grid was removed after sowing and each plot was then protected with a cage made out of  
232 chicken wire of 100 × 50 × 30 cm high. We thus obtained four pairs of plots, each pair with an  
233 identical composition and layout. In one of the two plots of each pair, we applied 99 g of organic  
234 fertilizer (DCM Gazonmeststof/Engrais pelouse; NPK (Mg) 9-4-7 (2)) on 24 February 2014, which  
235 gave us two replicas of four plots each, one with and one without fertilizer. The *Rhinanthus* density  
236 in each plot at sowing was 362 seeds per m<sup>2</sup>, which is relatively low compared to sowing densities  
237 used in other experiments (600-1000 m<sup>2</sup>; Westbury & Dunnett, 2007).

238 Starting in March 2014, we recorded seedling emergence at least twice a week in all plots, and  
239 followed the fate of the plants until seed set. The date of emergence and the date of opening of the

240 first flower were recorded, as well as the date of death if this happened before completion of the life  
241 cycle. For plants that survived until reproduction, we photographed the inflorescence to verify the  
242 class of the plant (*R. major*, *R. minor* or F<sub>1</sub> hybrid) using flower morphology. We recorded the  
243 number of flowers produced (on the main inflorescence and on secondary branches if present) and  
244 harvested each fruit with the surrounding calyx using small scissors when the seeds were ripe and  
245 the capsule dehisced, storing the capsules individually in 24-well plates. The number of seeds  
246 present in each capsule was determined by removing the fruit from the well, emptying and  
247 discarding the capsule, counting the developed seeds and putting them back into the well. Some  
248 seeds may have fallen from their capsule before they could be harvested and counted (e.g. during  
249 strong winds), and some plants lost entire fruits due to herbivore damage, so the total number of  
250 seeds counted is likely to be an underestimate of the total number of seeds produced. We therefore  
251 also used the total number of flowers produced as a measure of fitness, since seed production in  
252 *Rhinanthus* is never pollen-limited (Natalis & Wesselingh, 2012a; Hargreaves *et al.*, 2015) and fruit  
253 set in the field is practically always 100% (R.A. Wesselingh, pers. obs.). A small amount of leaf  
254 material was collected for DNA extraction from each plant after flowering had finished, to  
255 minimize the impact of the removal of leaf biomass on flower and seed production. The leaf  
256 material was immediately stored at -80°C until analysis.

257 We checked the identity of the resulting plants for several reasons. First, *R. minor* is capable of  
258 autonomous self-pollination (Ducarme & Wesselingh, 2013) and even emasculation of a closed  
259 flower bud is not always sufficient to prevent selfing. This means that the offspring from crosses  
260 between *R. minor* and *R. major* may still contain pure *R. minor* seeds. Second, errors could have  
261 occurred during pollination, seed counting, during the transfer of the seeds from the 24-well storage  
262 plates to the 96-well plates and during sowing. Finally, because of the proximity of a mixed  
263 population of both species to the transplant site, we could not exclude that some seeds from this  
264 population would have been dispersed into the area where we had sown our experimental plots.  
265 Indeed, we did find a few plants inside the plots that were not close to a toothpick, which were

266 considered to be intruders and excluded from our analysis. Since it is possible that other such seeds  
267 would have been present in grid cells where we had sown a seed, we checked the identity of all the  
268 flowering plants, using the photographs taken during flowering and a genetic identification tool. For  
269 this latter, we chose one species-specific SNP marker out of a panel of more than 3000 SNP  
270 markers that consistently differed between the two species we detected using ddRADseq analysis  
271 on 57 plants of the two species (K. Mirzaei & R.A. Wesselingh, in prep.) from the same source  
272 populations as the ones used to create the F<sub>1</sub> hybrids in this experiment. Primers were developed to  
273 amplify the specific fragment containing the SNP using PCR, and the presence/absence of the SNP  
274 was detected by digesting the extracted and amplified DNA with an enzyme with a restriction site  
275 that contained the SNP marker. The fragment was only digested when the SNP marker for *R. major*  
276 was present, which led to an electrophoretic banding pattern with only one, undigested band of 250  
277 bp for *R. minor*, a pattern with two bands of 70 and 180 bp, respectively, for *R. major* and a pattern  
278 with all three bands present for the F<sub>1</sub> hybrids (see Supplementary information for details).

279

## 280 **Data analysis**

281 All statistical calculations were done in R version 3.5.0 using RStudio version 1.1.453.

282 To describe the germination process under controlled conditions, we used a three-parameter  
283 log-logistic model  $F(t) = d / (1 + \exp[b \{ \log(t) - \log(t_{50}) \}])$ , in which  $t$  is time (in days),  $d$  is the final  
284 germination percentage,  $t_{50}$  the time point at which half of the seeds have germinated, and  $b$  the  
285 slope of the curve at time point  $t_{50}$  (Ritz *et al.*, 2013). The model was fitted to the data for each  
286 class separately using the R package *drc* (Ritz *et al.*, 2015).

287 For greenhouse performance, we used total flower production (log<sub>10</sub>-transformed) as the  
288 dependent variable and tested for differences among classes using a linear model.

289 Differences among the classes in emergence and survival until flowering in the field were  
290 analysed using logistic regressions with emergence/survival as the dependent variable and class,  
291 fertilizer application and their interaction as factors. When the class effect was significant, we used

292 pairwise G-tests (R package RVAideMemoire), with the Hochberg correction for multiple  
293 comparisons (Hochberg, 1988). Differences among the classes in the date of emergence and  
294 flowering were analysed using linear models with date as the dependent variable and class, fertilizer  
295 application and their interaction as factors. Post-hoc Tukey tests were performed using the R  
296 package emmeans when the effect of one or more factors was significant. We applied the same  
297 method to the total number of flowers and the total number of seeds produced per plant; these  
298 variables were log<sub>10</sub>-transformed first to obtain normality. In order to compare our results with  
299 those of Kwak (1980), who used the number of seeds per flower, we also analysed the per-plant  
300 average number of seeds per flower in a linear model with class and total number of flowers as  
301 factors.

302

## 303 **Results**

### 304 **Germination under controlled conditions**

305 The hybrid seeds formed on *R. minor* (F<sub>1m</sub>) were the first to start germinating and this class also  
306 reached the highest germination rate (Table 1, Fig. 1). It took only 49 days for this hybrid class to  
307 reach half of its final germination percentage, compared to 61 days for *R. minor* and 74 for both *R.*  
308 *major* and the F<sub>1a</sub> hybrid. Only 15% of the F<sub>1a</sub> hybrid seeds germinated, compared to 80% and higher  
309 for the seeds of the other three classes.

### 310 **Greenhouse flower production**

311 In 2013, there were no significant differences in flower production among the classes (Table 2, Fig.  
312 2a). In 2014, in the new greenhouse, the number of flowers per plant was lower overall and highest  
313 in the F<sub>1m</sub> hybrids, followed by *R. minor* and *R. major* with the lowest flower production (Table 2,

314 Fig. 2b). The  $F_{1a}$  hybrids showed an intermediate flower production and did not differ significantly  
315 from the other classes.

### 316 **Emergence and survival in the field**

317 The first emerging seedlings were observed in the outdoor plots on 10 March 2014, and a total of  
318 260 seedlings emerged at the grid positions. Of these seedlings, a total of 133 survived until  
319 flowering. Four plants were subsequently identified as intruders and excluded from the data set: two  
320 sown seeds were supposed to be  $F_{1a}$  hybrids, but the resulting plants were identified as *R. minor*,  
321 both morphologically and genetically. One *R. major* plant appeared where an *R. minor* seed had  
322 been sown, and one  $F_1$  hybrid emerged and flowered at the location of an *R. major* seed. Six seeds  
323 from *R. minor* x *R. major* crosses, which were expected to be  $F_{1m}$  hybrids, turned out to be (selfed)  
324 *R. minor* seeds, and these were kept in the data set and classified as belonging to the *R. minor* class.  
325 Similarly, two cases were discovered in which an  $F_{1a}$  hybrid turned out to be *R. major*, and we  
326 classified these two plants as *R. major*. Three plants died shortly after they started flowering, so no  
327 fitness data could be recorded, which resulted in 126 flowering plants for which we had at least the  
328 total number of flowers produced.

329 The overall emergence rate was 22.3%, and we observed some differences among the classes  
330 in emergence rate (Fig. 3), especially in the plots with fertilizer, but these were not statistically  
331 significant (Table 3). Likewise, the emergence rate was usually higher in the unfertilized plots  
332 compared to the fertilized plots, but this effect did not reach statistical significance either, nor did  
333 the interaction between class and fertilizer application, although *R. major* showed a tendency  
334 towards a higher probability of emergence in fertilized plots, in contrast to the other three classes.

335 The date of germination differed significantly among classes as did the response in the  
336 different classes to fertilizer treatment (Fig. 4, Table 4). The  $F_{1m}$  hybrids emerged earlier than most  
337 other classes, while the  $F_{1a}$  hybrids showed a later emergence in the fertilized plots.

338 Half (50.4%) of all the seedlings survived until flowering, and there were strong differences  
339 among the classes (Fig. 5). In the unfertilized plots, *R. major* seedlings had a significantly lower

340 survival rate than the other three classes (Table 5). Again, *R. major* survival was higher in fertilized  
341 plots compared to unfertilized plots, while this was usually reverse in the other classes, but the  
342 interaction effect was not significant. The same patterns were found when emergence and survival  
343 were combined into a single value for survival from seed until flowering (data not shown).

#### 344 **Flower and seed production in the field**

345 The first flower opened on 20 May 2014 and the onset of flowering was spread over six weeks. By  
346 the beginning of July, all plants but one had started flowering (Fig. 6). The  $F_{1m}$  hybrids were  
347 significantly earlier than the *R. minor* plants, and there was no effect of fertilizer application on the  
348 onset of flowering (Table 6).

349 The total number of flowers produced per plant varied between 1 and 50 (Fig. 7a). There were  
350 clear differences among the classes, and flower production was much higher in the fertilized plots  
351 (Table 7). The  $F_{1m}$  hybrid class produced significantly more flowers than *R. major* without fertilizer  
352 and more flowers than both parental species with fertilizer application. The lowest number of  
353 flowers was produced by plants in the *R. major* class regardless of fertilizer treatment.

354 The total number of seeds per plant was mainly determined by the total number of flowers per  
355 plant, which varied much more strongly among plants than the average number of seeds per fruit.  
356 Both variables together explained over 90% of the variance in seed production (linear model: seeds  
357 =  $-18.9086 + 4.1562 * \text{flowers} + 4.9156 * \text{seeds per fruit}$ ,  $df = 96$ , adjusted  $R^2 = 0.9173$ ,  $F_{2, 96} =$   
358  $544.8$ ,  $P < 0.0001$ ), but the number of flowers on its own already explained 86.65% of the variance,  
359 which increased only with an additional 5% by adding the average number of seeds per fruit to the  
360 model. A linear model with only the number of seeds per fruit explained 13.13% of the variance and  
361 adding the number of flowers to this model contributed a further 77.9% to explaining the total  
362 variance. The patterns in seed production were therefore comparable to those found when  
363 considering flower production only: an overall higher seed production in the fertilized plots and a  
364 higher seed production for  $F_{1m}$  hybrids compared to the parental classes in the plots with fertilizer  
365 (Fig. 7b).

366           Although quite variable among plants, the average number of seeds per flower varied much  
367 less among classes, and the linear model found no significant effect of plant class or total number of  
368 flowers (Table 8). There was a tendency for the number of seeds per flower to increase with the  
369 total number of flowers, and the nearly significant class effect was due to *R. major*, which had a  
370 steeper increase than the other classes (Supplementary figure 2).  
371



## 372 Discussion

### 373 F<sub>1</sub> hybrid performance

374 As expected from previous studies, the observed germination percentage in F<sub>1a</sub> hybrids in the  
375 laboratory was much lower than for the other three classes, while the F<sub>1m</sub> hybrids germinated both  
376 faster and slightly better than the parental lines. After germination, both reciprocal F<sub>1</sub> hybrids  
377 between *Rhinanthus major* and *R. minor* did now show any sign of hybrid inferiority in the  
378 greenhouse: they produced as many flowers as *R. minor*, the most productive parent, and the F<sub>1m</sub>  
379 hybrids actually outperformed the other parental species, *R. major*, in one year. This pattern was  
380 confirmed in the field experiment: the hybrids survived just as well as *R. minor* and outperformed  
381 *R. major* in both survival and flower/seed production in the plots without fertilizer addition. In the  
382 fertilized plots, survival was not different among the classes, but the F<sub>1</sub> hybrids again outperformed  
383 *R. major* in flower/seed production, and the F<sub>1m</sub> hybrids even surpassed their maternal parent. This  
384 could be a sign of heterosis (Rieseberg *et al.*, 1999), possibly caused by the fact that *R. minor* is  
385 highly selfing (Ducarme & Wesselingh, 2013), and F<sub>1</sub> hybrids are more heterozygous than their  
386 maternal parent, but why this would express itself especially on the *R. minor* cytoplasmic  
387 background is not clear. In a previous study, a lower number of seeds per flower was found for  
388 hybrids (identified by flower morphology) between the two *Rhinanthus* species (Kwak, 1980). In  
389 our study, the average number of seeds per flower does not go above 6 in the F<sub>1m</sub> hybrids, as it does  
390 for some of the plants in the parental lines (Supplementary figure 2), but this lower average is more  
391 than compensated for by a higher number of flowers in this class. This finding stresses the  
392 importance of measuring fitness as a whole, i.e. the total number of offspring produced, and not just  
393 a single fitness component (Arnold & Hodges, 1995).

394 Overall, our finding of a relatively high fitness for F<sub>1</sub> hybrids is congruent with the fact that in  
395 all populations where the two parental species occur together, hybrids are found, from around 5%  
396 F<sub>1</sub> hybrids in the first year (Ducarme *et al.*, 2010; Ducarme & Wesselingh, 2013) to extensive

397 hybrid swarms, most of them close to *R. major*, in populations with a longer history of mixing  
398 (Ducarme *et al.*, 2010).

### 399 **Differences between laboratory/greenhouse and field**

400 Our second goal was to compare performance, and especially germination, between laboratory  
401 conditions and the field situation. It turned out that the strikingly lower germination rate that has  
402 always been observed in  $F_{1a}$  hybrids in the laboratory practically disappeared under field conditions,  
403 although emergence in the plots with fertilizer tended to be somewhat lower for  $F_{1a}$  hybrids than in  
404 the other classes. We examined the data for each cross separately, and found that out of the 17 *Ra* ×  
405 *Rm* crosses that were represented in the lab and in the field (a single cross was only studied in the  
406 lab and did not show any germination), all but one had a non-zero emergence rate in the field, while  
407 nine of these showed no germination in the lab. The emergence rates in the field for the crosses  
408 without germination in the lab were in the same range as those for the crosses with germination in  
409 the lab ( $n = 8$ ). This teaches us an important lesson, which is not to rely on laboratory data only to  
410 assess hybrid fitness in our study system. Apparently, the laboratory conditions for germination,  
411 with a constant temperature of 5°C, do not sufficiently mimic outdoor conditions, where  
412 temperatures fluctuate more and seeds remain in the soil for much longer periods. Strong  
413 differences in germination rate between garden (in pots in a cold frame) and laboratory (petri dishes  
414 in a refrigerator) conditions were found by Champion-Bourget (1983) for seeds collected in pure  
415 populations of several *Rhinanthus* species.

416 The relative differences in timing of germination in the lab, however, are also found in the field  
417 experiment, with  $F_{1m}$  hybrids always emerging earlier than the other classes. This difference is  
418 carried over to the date of flowering, with  $F_{1m}$  hybrids again being the first to reach the flowering  
419 stage. The cold requirement for  $F_{1m}$  hybrids appears to be lower in terms of the number of cold days  
420 needed before germination, and this gives them an advantage over *R. minor*. In the greenhouse, *R.*  
421 *minor* develops slower than *R. major*, and an almost 3-week difference in flowering date is found

422 between seedlings of both species planted on the same day (R.A. Wesselingh, pers. obs.). This could  
423 in part be due to a slightly lower average seed weight for *R. minor* compared to *R. major*, which  
424 will lead to slightly smaller seedlings, but there is large variation among populations and among  
425 seeds within fruits (Ernst *et al.*, 1987). It appears that *R. minor* has a lower intrinsic growth rate  
426 than *R. major*, but this has not yet been investigated systematically. In *Zea mays*, flowering time in  
427 hybrids from crosses between inbred lines was also accelerated, coupled with an increase in  
428 biomass and fertility (Birchler *et al.*, 2010).

### 429 **Effects of fertilizer addition**

430 The addition of a single dose of organic fertilizer to half of the experimental plots in February had  
431 visible effects on the grassy vegetation: the grass became darker green and the average sward height  
432 increased from an estimated 20 cm to around 30 cm (R.A. Wesselingh, pers. obs.). The relatively  
433 nutrient-poor conditions in the unfertilized plots clearly favoured *R. minor* and both hybrid classes  
434 in the early life stages compared to *R. major*, which had a lower survival than the other three  
435 classes. The addition of fertilizer led to an increase in survival in *R. major*, while it decreased  
436 survival in the other three classes. Although the effects of class and fertilizer addition on emergence  
437 were not significant, again *R. major* reacted with an increase in emergence in the fertilized plots,  
438 while the emergence in the other three classes decreased. Flower and seed production were much  
439 higher in all classes in the plots with fertilizer. It is known that *Rhinanthus* species in general react  
440 negatively to high grassland productivity (Mudrak *et al.*, 2013), and a decrease in survival in *R.*  
441 *minor* as a result of fertilization of an oligotrophic meadow has been observed (Mudrak & Lepš,  
442 2010). A positive effect of fertilizer addition on *R. major* emergence and survival in the nutrient-  
443 poor grassland in our experiment confirms the general idea that *R. major* is better adapted to more  
444 mesotrophic grasslands compared to *R. minor*.

445 *Rhinanthus* species can occur a diverse range of grassland habitats on different soil types, with  
446 large variation in water and nutrient availability (Westbury, 2004). Although we obtained data for

447 the full life cycle of the two parental species and their F<sub>1</sub> hybrids, our field experiment only looked  
448 at a single habitat type in a single year. This has given us valuable insight into the fitness of these  
449 first-generation hybrids, suggesting that they can perform as well as the parent with the best  
450 performance in this given situation, but more field transplants are needed to cover the full range of  
451 habitat types and to account for variability among years (Postma & Ågren, 2018). Since the  
452 formation and establishment of F<sub>1</sub> hybrids are clearly not a bottleneck, we will focus our future  
453 work on advanced hybrids, including F<sub>2</sub> and backcrosses, but also hybrids in natural populations,  
454 not only to determine fitness in transplant experiments, but also to identify introgressed loci  
455 involved in local adaptation (Martin *et al.*, 2006; Suarez-Gonzalez *et al.*, 2018). In our study  
456 system, hybrids close to *R. major* are much more frequent, because the pollinating bumblebees visit  
457 the hybrids as often as the more attractive *R. major*, while *R. minor* is highly selfing and less  
458 visited. This leads to unilateral introgression from *R. minor* into *R. major* (Ducarme & Wesselingh,  
459 2005; Ducarme *et al.*, 2010), and work is currently underway to study which parts of the *R. minor*  
460 genome introgress preferentially into the *R. major* background and if they confer a fitness  
461 advantage and thus can cause adaptive introgression.

## 462 **Acknowledgements**

463 The authors thank Marie Eve Renard for counting the seeds produced in the greenhouse and in the  
464 field and the Dr. Siebold Bargehassus Fund for generous donations to support this research. This is  
465 publication number BRC429 of the Biodiversity Research Centre of UCLouvain.

## 466 References

- 467 Abbott, R., Albach, D., Ansell, S., Arntzen, J.W., Baird, S.J.E., Bierne, N., *et al.* 2013.  
468 Hybridization and speciation. *J Evol Biol* **26**: 229–46.
- 469 Arnold, M.L. 1993. *Iris nelsonii* (Iridaceae): origin and genetic composition of a homoploid hybrid  
470 species. *Am. J. Bot.* **80**: 577–583.
- 471 Arnold, M.L., Ballerini, E.S. & Brothers, A.N. 2012. Hybrid fitness, adaptation and evolutionary  
472 diversification: lessons learned from Louisiana Irises. *Heredity* **108**: 159–166.
- 473 Arnold, M.L. & Hodges, S.A. 1995. Are natural hybrids fit or unfit relative to their parents? *Trends*  
474 *Ecol. Evol.* **10**: 67–71.
- 475 Birchler, J.A., Yao, H., Chudalayandi, S., Vaiman, D. & Veitia, R.A. 2010. Heterosis. *Plant Cell*  
476 **22**: 2105–2112.
- 477 Burke, J.M., Carney, S.E. & Arnold, M.L. 1998. Hybrid fitness in the Louisiana irises: analysis of  
478 parental and F<sub>1</sub> performance. *Evolution* **52**: 37–43.
- 479 Cahenzli, F., Bonetti, C. & Erhardt, A. 2018. Divergent strategies in pre- and postzygotic  
480 reproductive isolation between two closely related *Dianthus* species. *Evolution* **72**: 1851–  
481 1862.
- 482 Campbell, D.R., Waser, N.M. & Meléndez-Ackerman, E.J. 1997. Analyzing pollinator-mediated  
483 selection in a plant hybrid zone: Hummingbird visitation patterns on three spatial scales.  
484 *Am. Nat.* **149**: 295–315.
- 485 Champion-Bourget, F. 1980a. L'hybridation interspécifique expérimentale chez les cinq principales  
486 espèces de *Rhinanthus* L. de France. *Rev. Cytol. Biol. Végétales - Bot.* **3**: 221–280.
- 487 Champion-Bourget, F. 1980b. L'autogamie et l'allogamie chez les cinq principales espèces de  
488 *Rhinanthus* L. de France. *Rev. Cytol. Biol. Végétales - Bot.* **3**: 199–219.
- 489 Champion-Bourget, F. 1983. La germination des graines des espèces françaises de *Rhinanthus* L.  
490 *Rev. Cytol. Biol. Végétales - Bot.* **6**: 15–94.
- 491 Cornman, R.S., Burke, J.M., Wesselingh, R.A. & Arnold, M.L. 2004. Contrasting genetic structure  
492 of adults and progeny in a Louisiana Iris hybrid population. *Evolution* **58**: 2669–2681.
- 493 Cruzan, M.B. & Arnold, M.L. 1993. Ecological and genetic associations in an Iris hybrid zone.  
494 *Evolution* **47**: 1432–1445.
- 495 Ducarme, V., Vrancken, J. & Wesselingh, R.A. 2010. Hybridization in annual plants: patterns and  
496 dynamics during a four-year study in mixed *Rhinanthus* populations. *Folia Geobot.* **45**:  
497 387–405.

- 498 Ducarme, V. & Wesselingh, R.A. 2005. Detecting hybridization in mixed populations of  
499 *Rhinanthus minor* and *Rhinanthus angustifolius*. *Folia Geobot.* **40**: 151–161.
- 500 Ducarme, V. & Wesselingh, R.A. 2010. Performance of two *Rhinanthus* species under different  
501 hydric conditions. *Plant Ecol.* **206**: 263–277.
- 502 Ducarme, V. & Wesselingh, R.A. 2013. Outcrossing rates in two self-compatible, hybridising  
503 *Rhinanthus* species: implications for hybrid formation. *Plant Biol.* **15**: 541–547.
- 504 Emms, S.K. & Arnold, M.L. 1997. The effect of habitat on parental and hybrid fitness: transplant  
505 experiments with Louisiana irises. *Evolution* **51**: 1112–1119.
- 506 Emms, S.K. & Arnold, M.L. 2000. Site-to-site differences in pollinator visitation patterns in a  
507 Louisiana iris hybrid zone. *Oikos* **91**: 568–578.
- 508 Ernst, W.H.O., Nelissen, H.J.M. & de Hullu, E. 1987. Size hierarchy and mineral status of  
509 *Rhinanthus angustifolius* populations under different grassland management regimes.  
510 *Vegetatio* **70**: 93–103.
- 511 Favre, A., Widmer, A. & Karrenberg, S. 2017. Differential adaptation drives ecological speciation  
512 in champions (*Silene*): evidence from a multi-site transplant experiment. *New Phytol.* **213**:  
513 1487–1499.
- 514 Favre, A. & Karrenberg, S. 2011. Stress tolerance in closely related species and their first-  
515 generation hybrids: a case study of *Silene*. *J. Ecol.* **99**: 1415–1423.
- 516 Gramlich, S., Sagmeister, P., Dullinger, S., Hadacek, F. & Hörandl, E. 2016. Evolution *in situ*:  
517 hybrid origin and establishment of willows (*Salix* L.) on alpine glacier forefields. *Heredity*  
518 **116**: 531–541.
- 519 Gramlich, S. & Hörandl, E. 2016. Fitness of natural willow hybrids in a pioneer mosaic hybrid  
520 zone. *Ecol. Evol.* **6**: 7645–7655.
- 521 Hargreaves, A.L., Weiner, J.L. & Eckert, C.G. 2015. High-elevation range limit of an annual herb is  
522 neither caused nor reinforced by declining pollinator service. *J. Ecol.* **103**: 572–584.
- 523 Hipperson, H., Dunning, L.T., Baker, W.J., Butlin, R.K., Hutton, I., Papadopulos, A.S.T., *et al.*  
524 2016. Ecological speciation in sympatric palms: 2. Pre- and post-zygotic isolation. *J. Evol.*  
525 *Biol.* **29**: 2143–2156.
- 526 Hochberg, Y. 1988. A sharper Bonferroni procedure for multiple tests of significance. *Biometrika*  
527 **75**: 800–802.
- 528 Johnston, J.A., Grise, D.J., Donovan, L.A. & Arnold, M.L. 2001. Environment-dependent  
529 performance and fitness of *Iris brevicaulis*, *I. fulva* (Iridaceae), and hybrids. *Am. J. Bot.* **88**:  
530 933–938.
- 531 Johnston, J.A., Donovan, L.A. & Arnold, M.L. 2004. Novel phenotypes among early generation  
532 hybrids of two Louisiana iris species: flooding experiments. *J. Ecol.* **92**: 967.

- 533 Kimball, S., Campbell, D.R. & Lessin, C. 2008. Differential performance of reciprocal hybrids in  
534 multiple environments. *J. Ecol.* **96**: 1306–1318.
- 535 Kwak, M.M. 1978. Pollination, hybridization and ethological isolation of *Rhinanthus minor* and *R.*  
536 *serotinus* (Rhinanthoideae: Scrophulariaceae) by bumblebees (*Bombus* Latr.). *Taxon* **27**:  
537 145–158.
- 538 Kwak, M.M. 1979. Maintenance of species integrity in sympatrically occurring *Rhinanthus minor*  
539 and *R. serotinus* in the Netherlands. *Oecologia* **41**: 1–9.
- 540 Kwak, M.M. 1980. Artificial and natural hybridization and introgression in *Rhinanthus*  
541 (Scrophulariaceae) in relation to bumblebee pollination. *Taxon* **29**: 613–628.
- 542 Leebens-Mack, J. & Milligan, B.G. 1998. Pollination biology in hybridizing *Baptisia* (Fabaceae)  
543 populations. *Am. J. Bot.* **85**: 500–507.
- 544 Lepais, O., Roussel, G., Hubert, F., Kremer, A. & Gerber, S. 2013. Strength and variability of  
545 postmating reproductive isolating barriers between four European white oak species. *Tree*  
546 *Genet. Genomes* **9**: 841–853.
- 547 Lindtke, D., Gompert, Z., Lexer, C. & Buerkle, C.A. 2014. Unexpected ancestry of *Populus*  
548 seedlings from a hybrid zone implies a large role for postzygotic selection in the  
549 maintenance of species. *Mol. Ecol.* **23**: 4316–4330.
- 550 Martin, N.H., Bouck, A.C. & Arnold, M.L. 2006. Detecting adaptive trait introgression between *Iris*  
551 *fulva* and *I. brevicaulis* in highly selective field conditions. *Genetics* **172**: 2481–2489.
- 552 Mudrák, O., Mládek, J., Blažek, P., Lepš, J., Doležal, J., Nekvapilová, E., *et al.* 2013. Establishment  
553 of hemiparasitic *Rhinanthus* spp. in grassland restoration: lessons learned from sowing  
554 experiments. *Appl. Veg. Sci.* n/a.
- 555 Mudrák, O. & Lepš, J. 2010. Interactions of the hemiparasitic species *Rhinanthus minor* with its  
556 host plant community at two nutrient levels. *Folia Geobot.* **45**: 407–424.
- 557 Natalis, L.C. & Wesselingh, R.A. 2012a. Shared pollinators and pollen transfer dynamics in two  
558 hybridizing species, *Rhinanthus minor* and *R. angustifolius*. *Oecologia* **170**: 709–721.
- 559 Natalis, L.C. & Wesselingh, R.A. 2012b. Post-pollination barriers and their role in asymmetric  
560 hybridization in *Rhinanthus* (Orobanchaceae). *Am. J. Bot.* **99**: 1847–1856.
- 561 Natalis, L.C. & Wesselingh, R.A. 2013. Parental frequencies and spatial configuration shape  
562 bumblebee behavior and floral isolation in hybridizing *Rhinanthus*. *Evolution* **67**: 1692–  
563 1705.
- 564 Postma, F.M. & Ågren, J. 2018. Among-year variation in selection during early life stages and the  
565 genetic basis of fitness in *Arabidopsis thaliana*. *Mol. Ecol.* **27**: 2498–2511.
- 566 Rieseberg, L.H., Archer, M.A. & Wayne, R.K. 1999. Transgressive segregation, adaptation and  
567 speciation. *Heredity* **83**: 363–372.



- 568 Ritz, C., Pipper, C.B. & Streibig, J.C. 2013. Analysis of germination data from agricultural  
569 experiments. *Eur. J. Agron.* **45**: 1–6.
- 570 Ritz, C., Baty, F., Streibig, J.C. & Gerhard, D. 2015. Dose-Response Analysis Using R. *PLOS ONE*  
571 **10**: e0146021.
- 572 Strykstra, R.J., Bekker, R.M. & Verweij, G.L. 1996. Establishment of *Rhinanthus angustifolius* in a  
573 successional hayfield after seed dispersal by mowing machinery. *Acta Bot. Neerlandica* **45**:  
574 557–562.
- 575 Suarez-Gonzalez, A., Hefer, C.A., Lexer, C., Douglas, C.J. & Cronk, Q.C.B. 2018. Introgression  
576 from *Populus balsamifera* underlies adaptively significant variation and range boundaries in  
577 *P. trichocarpa*. *New Phytol.* **217**: 416–427.
- 578 ter Borg, S.J. 2005. Dormancy and germination in six *Rhinanthus* species in relation to climate.  
579 *Folia Geobot.* **40**: 243–260.
- 580 Těšitel, J., Lepš, J., Vráblová, M. & Cameron, D.D. 2011. The role of heterotrophic carbon  
581 acquisition by the hemiparasitic plant *Rhinanthus alectorolophus* in seedling establishment  
582 in natural communities: a physiological perspective. *New Phytol.* **192**: 188–199.
- 583 Tiffin, P., Olson, M.S. & Moyle, L.C. 2001. Asymmetrical crossing barriers in angiosperms. *Proc.*  
584 *R. Soc. B Biol. Sci.* **268**: 861–867.
- 585 Turelli, M. & Moyle, L.C. 2007. Asymmetric postmating isolation: Darwin’s corollary to Haldane’s  
586 rule. *Genetics* **176**: 1059–1088.
- 587 von Soó, R. & Webb, D.A. 1972. *Rhinanthus* L. In: *Flora Europaea Volume 3, Diapensiaceae to*  
588 *Myoporaceae* (T. G. Tutin, V. H. Heywood, N. A. Burges, D. M. Moore, D. H. Valentine, S.  
589 M. Walters, et al., eds), pp. 276–280. Cambridge University Press, Cambridge, UK.
- 590 Vrancken, J., Brochmann, C. & Wesselingh, R.A. 2012. A European phylogeography of *Rhinanthus*  
591 *minor* compared to *R. angustifolius*: unexpected splits and signs of hybridization. *Ecol.*  
592 *Evol.* **2**: 1531–1548.
- 593 Westbury, D.B. 2004. Biological Flora of the British Isles: *Rhinanthus minor* L. *J. Ecol.* **92**: 906–  
594 927.
- 595 Westbury, D.B. & Dunnett, N.P. 2007. The impact of *Rhinanthus minor* in newly established  
596 meadows on a productive site. *Appl. Veg. Sci.* **10**: 121–129.



597 **Tables**

598

599 **Table 1.** Parameter estimates (standard errors in parentheses) for the germination curves of the four  
600 classes of seeds under controlled conditions.

| Class           | <i>b</i>        | <i>d</i>      | <i>t</i> <sub>50</sub> |
|-----------------|-----------------|---------------|------------------------|
| <i>R. minor</i> | -14.431 (1.918) | 0.805 (0.045) | 61.17 (0.957)          |
| F <sub>1m</sub> | -8.520 (0.749)  | 0.981 (0.013) | 49.38 (0.998)          |
| F <sub>1a</sub> | -10.185 (2.187) | 0.151 (0.035) | 74.13 (3.267)          |
| <i>R. major</i> | -14.812 (1.604) | 0.861 (0.041) | 74.84 (1.159)          |

601

602

603

604

605

606 **Table 2.** ANOVA table for the linear model on the log-transformed number of flowers produced by  
607 *Rhinanthus* plants in the greenhouse in 2013 and 2014 with class as main factor.

| Factor                 | df  | SS      | MS     | <i>F</i> | P (> <i>F</i> ) |
|------------------------|-----|---------|--------|----------|-----------------|
| <i>Greenhouse 2013</i> |     |         |        |          |                 |
| Class                  | 3   | 0.2804  | 0.0934 | 1.3424   | .2697           |
| Residuals              | 57  | 3.9682  | 0.0696 |          |                 |
| <i>Greenhouse 2014</i> |     |         |        |          |                 |
| Class                  | 3   | 3.3642  | 1.2081 | 14.4080  | <.0001***       |
| Residuals              | 222 | 18.6139 | 0.0839 |          |                 |

608

609

610 **Table 3.** Analysis of deviance for the logistic model on the probability of *Rhinanthus* seedling  
 611 emergence in the experimental field plots with class and fertilizer application as main factors.

| Factor             | df | Deviance | Residual df | Residual deviance | P ( $> \chi^2$ ) |
|--------------------|----|----------|-------------|-------------------|------------------|
| Null               |    |          | 1147        | 1218.4            |                  |
| Class              | 3  | 6.3541   | 1144        | 1212.1            | .0956            |
| Fertilizer         | 1  | 3.1572   | 1143        | 1208.9            | .0756            |
| Class x Fertilizer | 3  | 6.8822   | 1140        | 1202.0            | .0758            |

612

613

614

615 **Table 4.** ANOVA table for the linear model on the date of *Rhinanthus* seedling emergence in the  
 616 experimental field plots with class and fertilizer application as main factors.

| Factor             | df  | SS     | MS      | F      | P ( $> F$ ) |
|--------------------|-----|--------|---------|--------|-------------|
| Class              | 3   | 628.2  | 209.395 | 5.4955 | .0011**     |
| Fertilizer         | 1   | 8.1    | 8.072   | 0.2118 | .6457       |
| Class x Fertilizer | 3   | 416.5  | 138.819 | 3.6432 | .0134*      |
| Residuals          | 241 | 9182.9 | 38.103  |        |             |

617

618

619

620 **Table 5.** Analysis of deviance for the logistic model on the probability of surviving from seedling to  
 621 flowering with class and fertilizer application as main factors.

| Factor             | df | Deviance | Residual df | Residual deviance | P ( $> \chi^2$ ) |
|--------------------|----|----------|-------------|-------------------|------------------|
| Null               |    |          | 255         | 354.88            |                  |
| Class              | 3  | 14.0068  | 252         | 340.87            | .0029**          |
| Fertilizer         | 1  | 0.1017   | 251         | 340.77            | .7498            |
| Class x Fertilizer | 3  | 2.1977   | 248         | 338.57            | .5324            |

622

623

624 **Table 6.** ANOVA table for the linear model on the date of onset of flowering of *Rhinanthus* plants  
 625 in the experimental field plots with class and fertilizer application as main factors.

| Factor             | df  | SS      | MS     | <i>F</i> | P (> <i>F</i> ) |
|--------------------|-----|---------|--------|----------|-----------------|
| Class              | 3   | 1516.0  | 505.32 | 3.4105   | .0199*          |
| Fertilizer         | 1   | 115.6   | 115.64 | 0.7805   | .3788           |
| Class x Fertilizer | 3   | 144.0   | 48.00  | 0.3240   | .8080           |
| Residuals          | 117 | 17335.3 | 148.16 |          |                 |

626

627

628

629 **Table 7.** ANOVA table for the linear model on the log-transformed number of flowers produced by  
 630 *Rhinanthus* plants in the experimental field plots with class and fertilizer application as main  
 631 factors.

| Factor             | df  | SS      | MS     | <i>F</i> | P (> <i>F</i> ) |
|--------------------|-----|---------|--------|----------|-----------------|
| Class              | 3   | 1.9678  | 0.6559 | 6.3167   | .0005***        |
| Fertilizer         | 1   | 4.7599  | 4.7599 | 45.8389  | < .0001***      |
| Class x Fertilizer | 3   | 0.4738  | 0.1579 | 1.5210   | .2127           |
| Residuals          | 118 | 12.2530 | 0.1038 |          |                 |

632

633

634

635 **Table 8.** ANOVA table for the linear model on the average number of seeds per flower produced by  
 636 *Rhinanthus* plants in the experimental field plots with number of flowers and class as main factors.

| Factor            | df | SS       | MS     | <i>F</i> | P (> <i>F</i> ) |
|-------------------|----|----------|--------|----------|-----------------|
| N flowers         | 1  | 7.2970   | 7.2972 | 2.8014   | .0976           |
| Class             | 3  | 20.2200  | 6.7401 | 2.5876   | .0578           |
| N flowers x Class | 3  | 13.2890  | 4.4296 | 1.7006   | .1725           |
| Residuals         | 91 | 237.0370 | 2.6048 |          |                 |

637

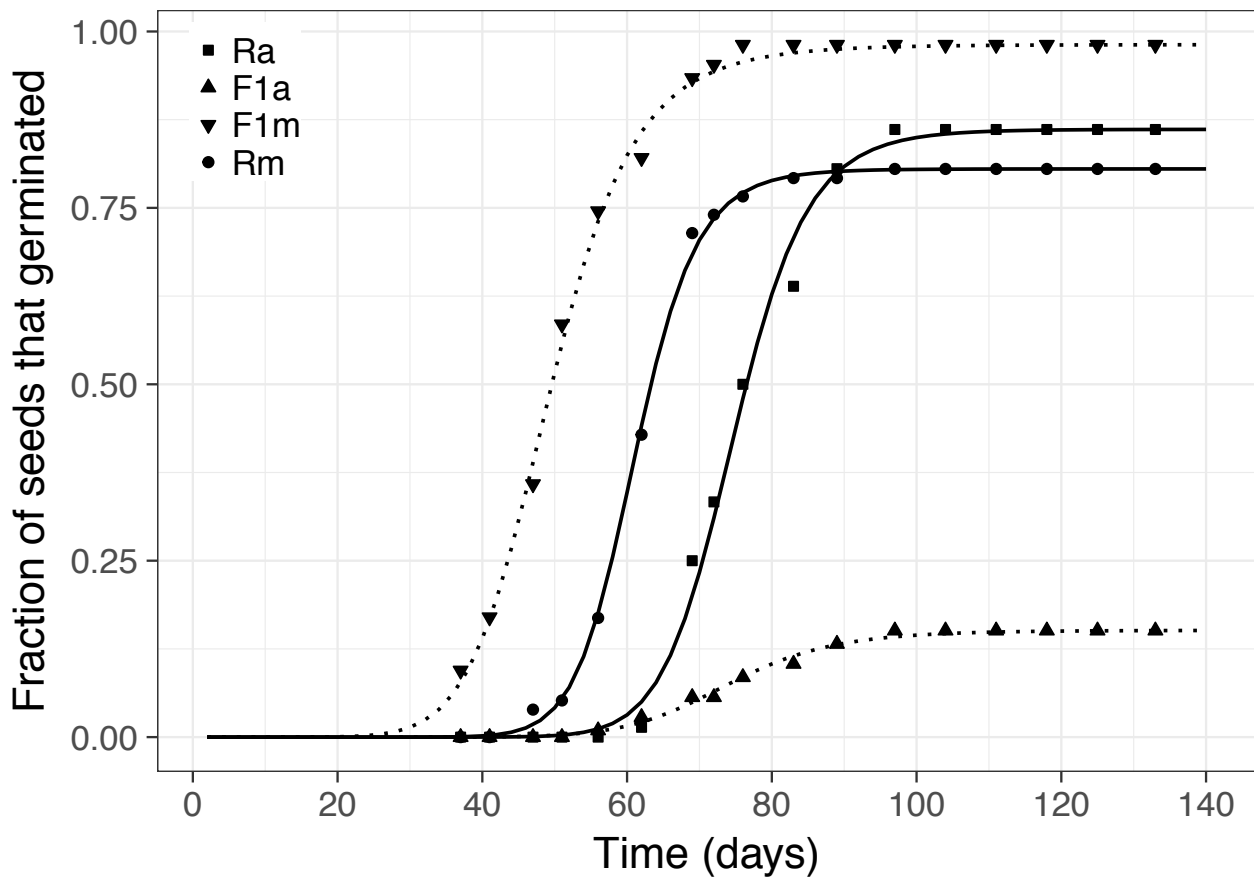

638

639 **Fig. 1.** Germination over time under controlled conditions in the laboratory (5°C) with the fitted  
640 three-parameter log-logistic curves for the two species (continuous lines) and their hybrids (dotted  
641 lines). Rm = *Rhnanthus minor*, F1m =  $F_{1m}$  hybrids, F1a =  $F_{1a}$  hybrids, and Ra = *Rhnanthus major*.

642

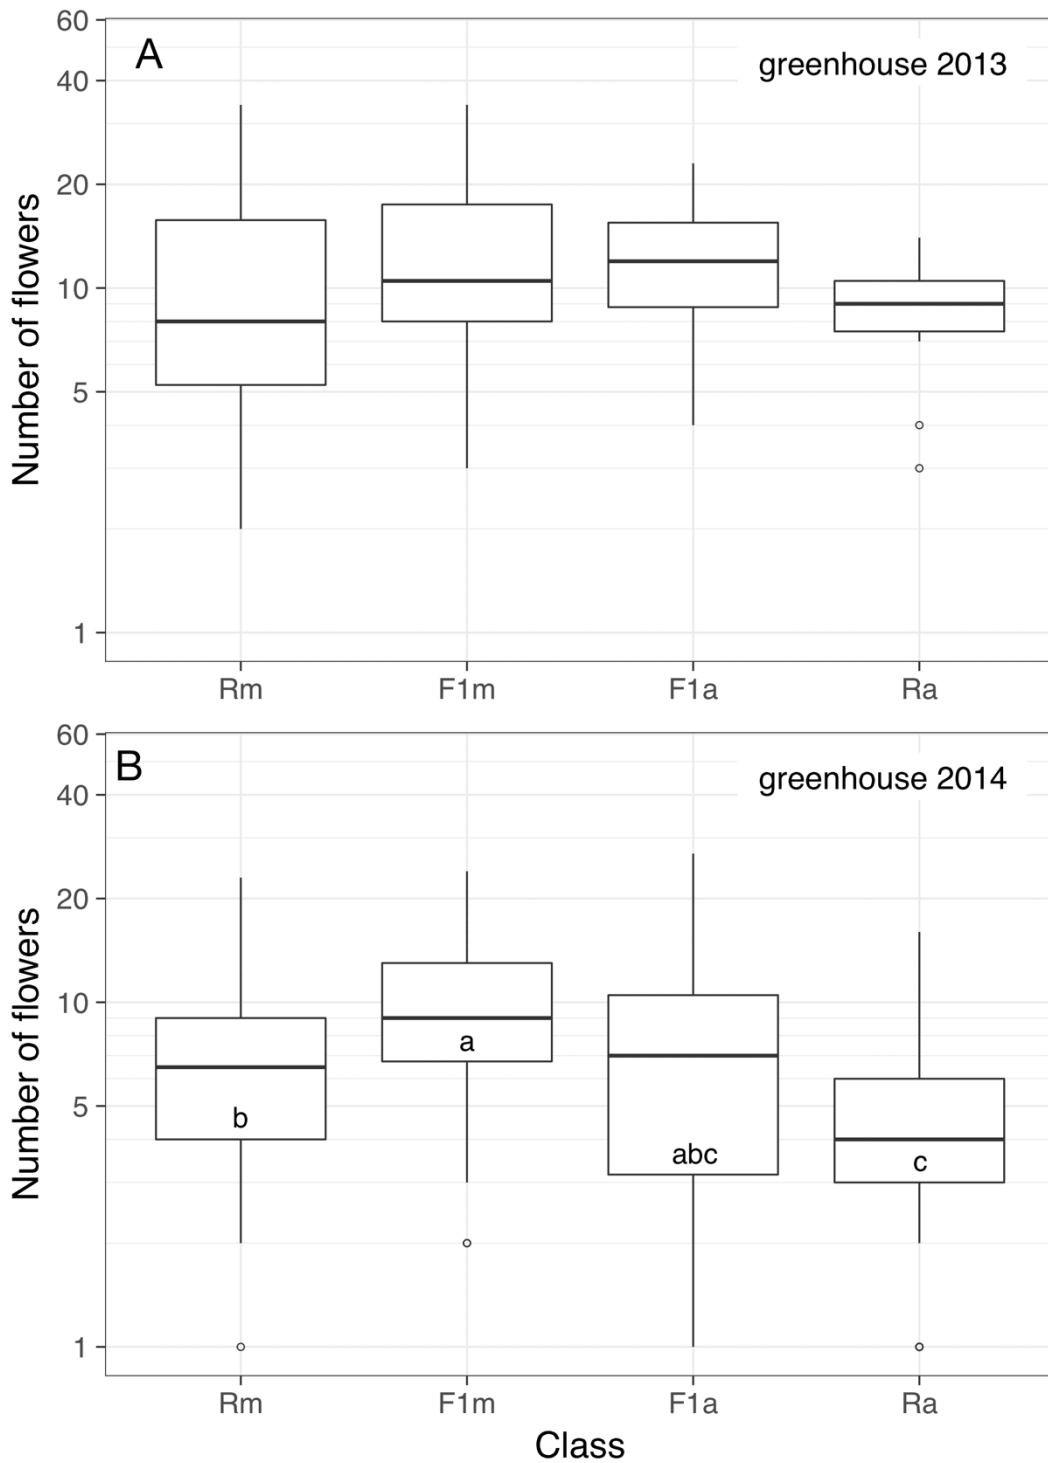

643

644 **Fig. 2.** Box and whisker plots for the total number of flowers produced (on a logarithmic scale) for  
645 four classes (Rm: *Rhinanthus minor*, F1m:  $F_{1m}$  hybrids, F1a:  $F_{1a}$  hybrids, Ra: *Rhinanthus major*) in  
646 the old greenhouse in 2013 (a) and the new greenhouse in 2014 (b). Boxes that share an identical  
647 letter within each fertilizer treatment did not differ significantly from each other in post-hoc Tukey  
648 tests.

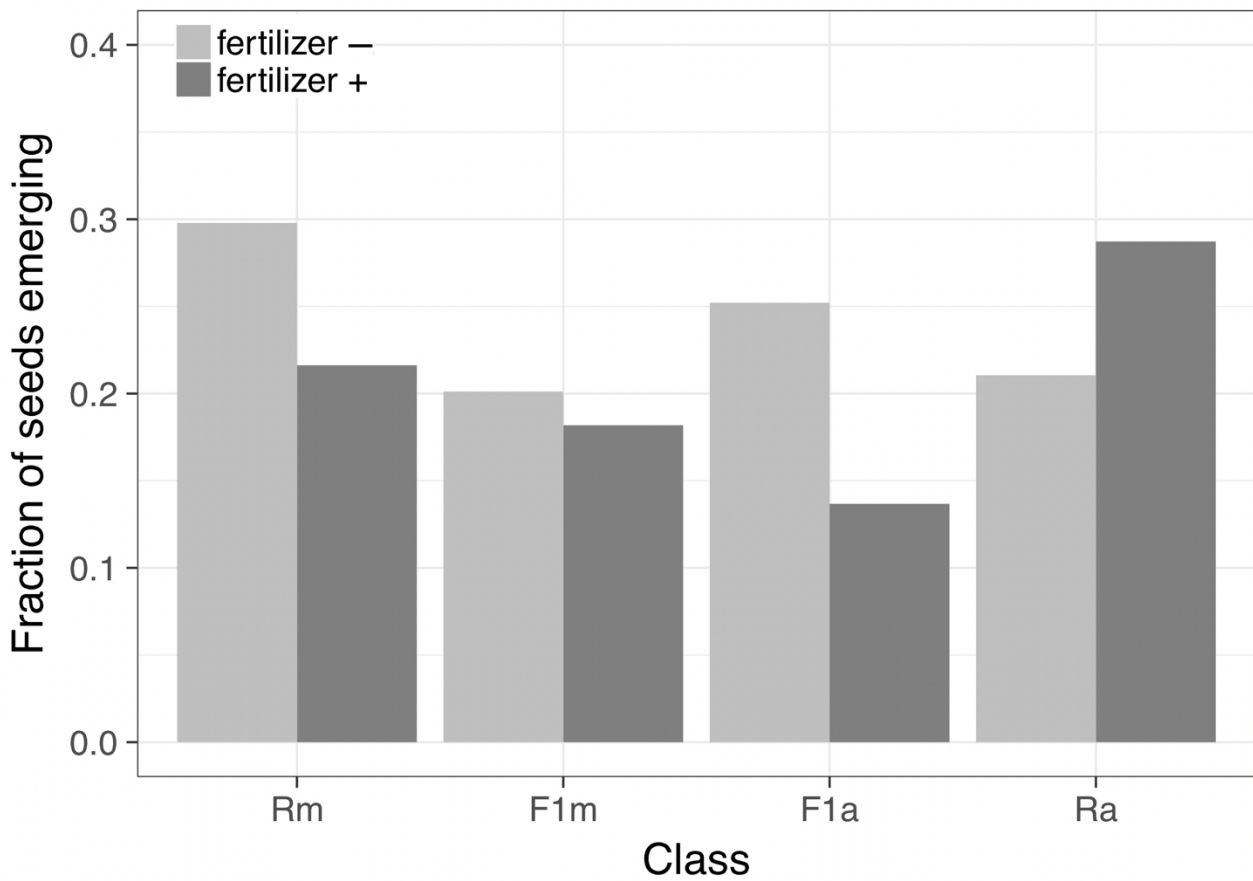

649

650

651 **Fig. 3.** The fraction of seeds emerging as seedlings in the outdoor plots for four classes (Rm:  
652 *Rhinanthus minor*, F1m:  $F_{1m}$  hybrids, F1a:  $F_{1a}$  hybrids, Ra: *Rhinanthus major*) and two fertilizer  
653 treatments.

654

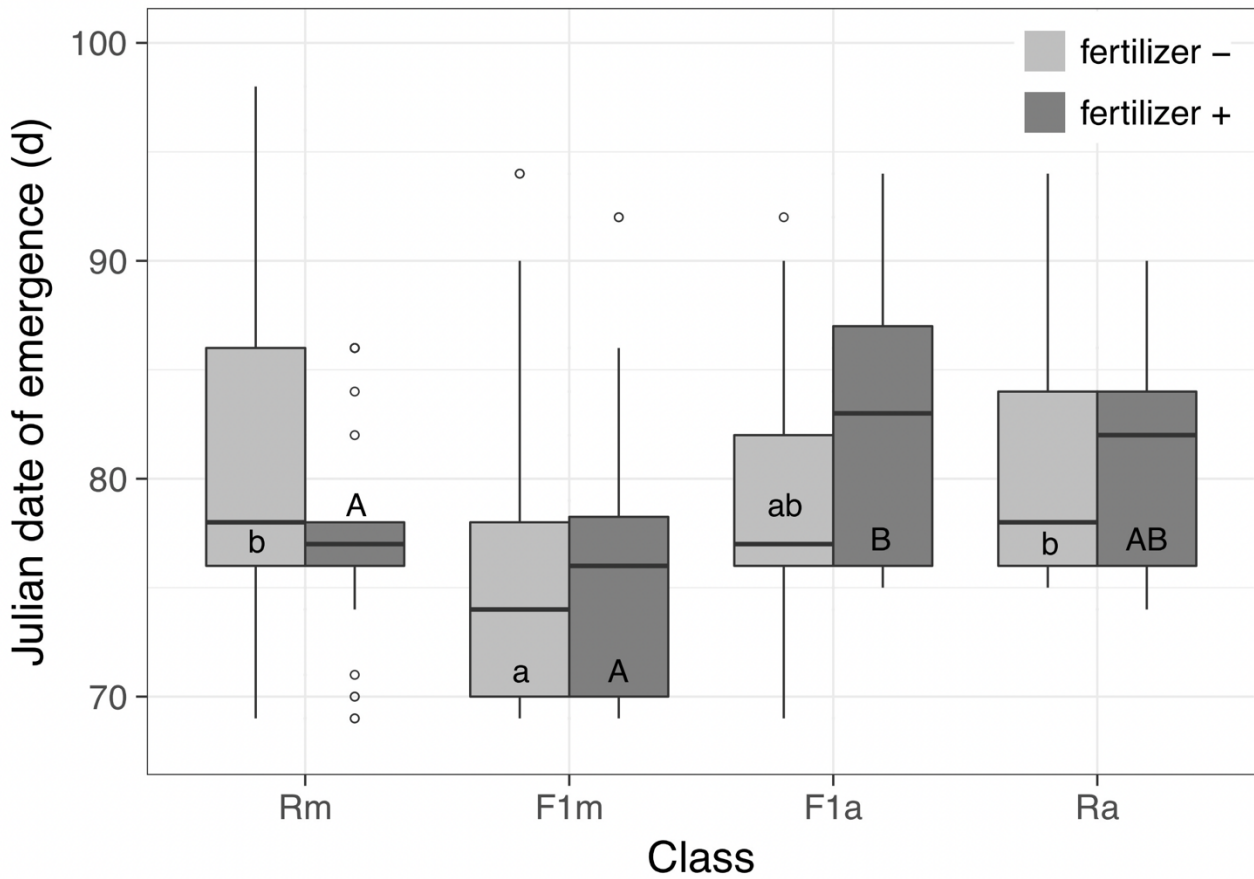

655

656 **Fig. 4.** Box and whisker plots for the date of emergence, given as the Julian date, for four classes  
657 (Rm: *Rhinanthus minor*, F1m:  $F_{1m}$  hybrids, F1a:  $F_{1a}$  hybrids, Ra: *Rhinanthus major*) and two fertilizer  
658 treatments. Boxes that share an identical letter did not differ significantly from each other in post-  
659 hoc Tukey tests.

660

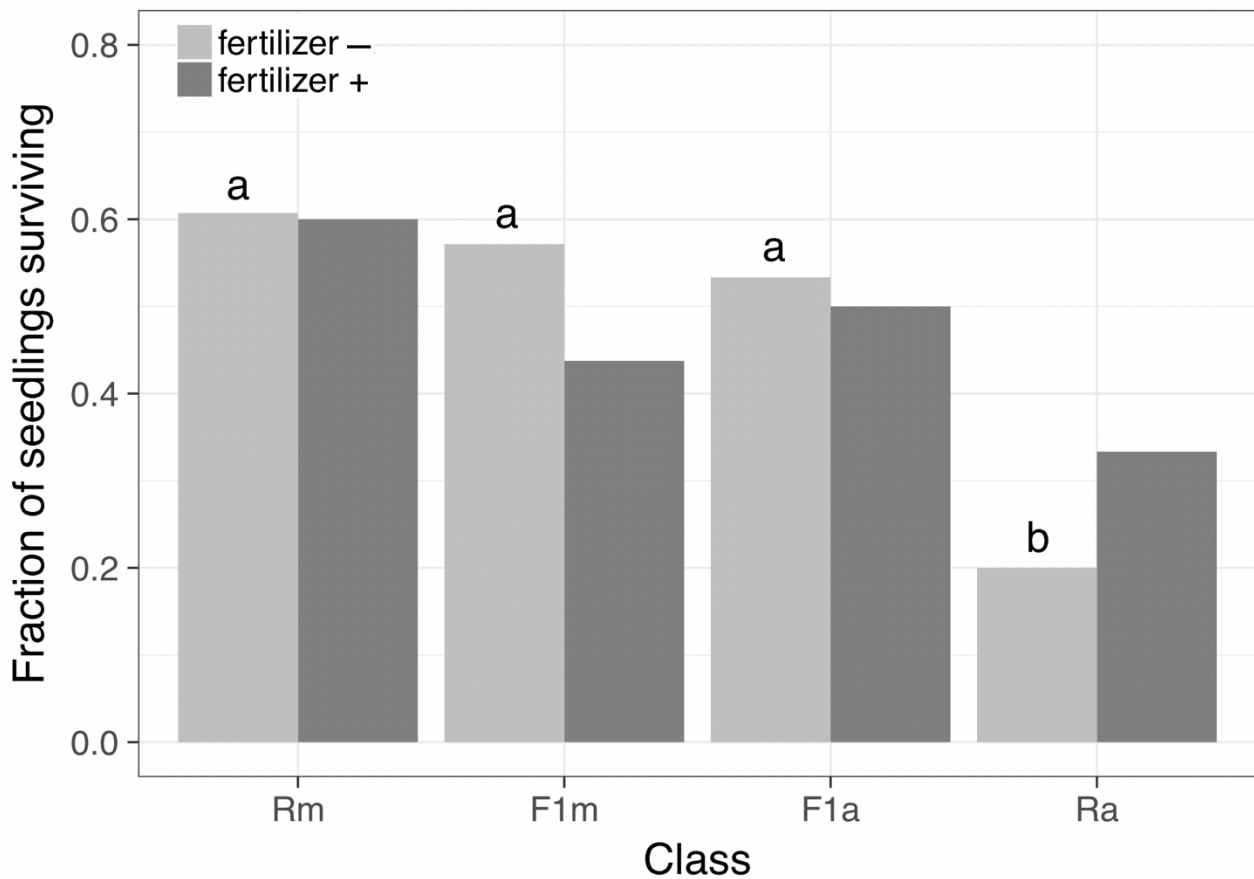

661

662 **Fig. 5.** The fraction of seedlings surviving until flowering in the outdoor plots for four classes (Rm:

663 *Rhinanthus minor*, F1m:  $F_{1m}$  hybrids, F1a:  $F_{1a}$  hybrids, Ra: *Rhinanthus major*) and two fertilizer

664 treatments. Bars with identical letters (for the plots without fertilizer) did not differ significantly

665 from each other in pairwise *G*-tests.

666



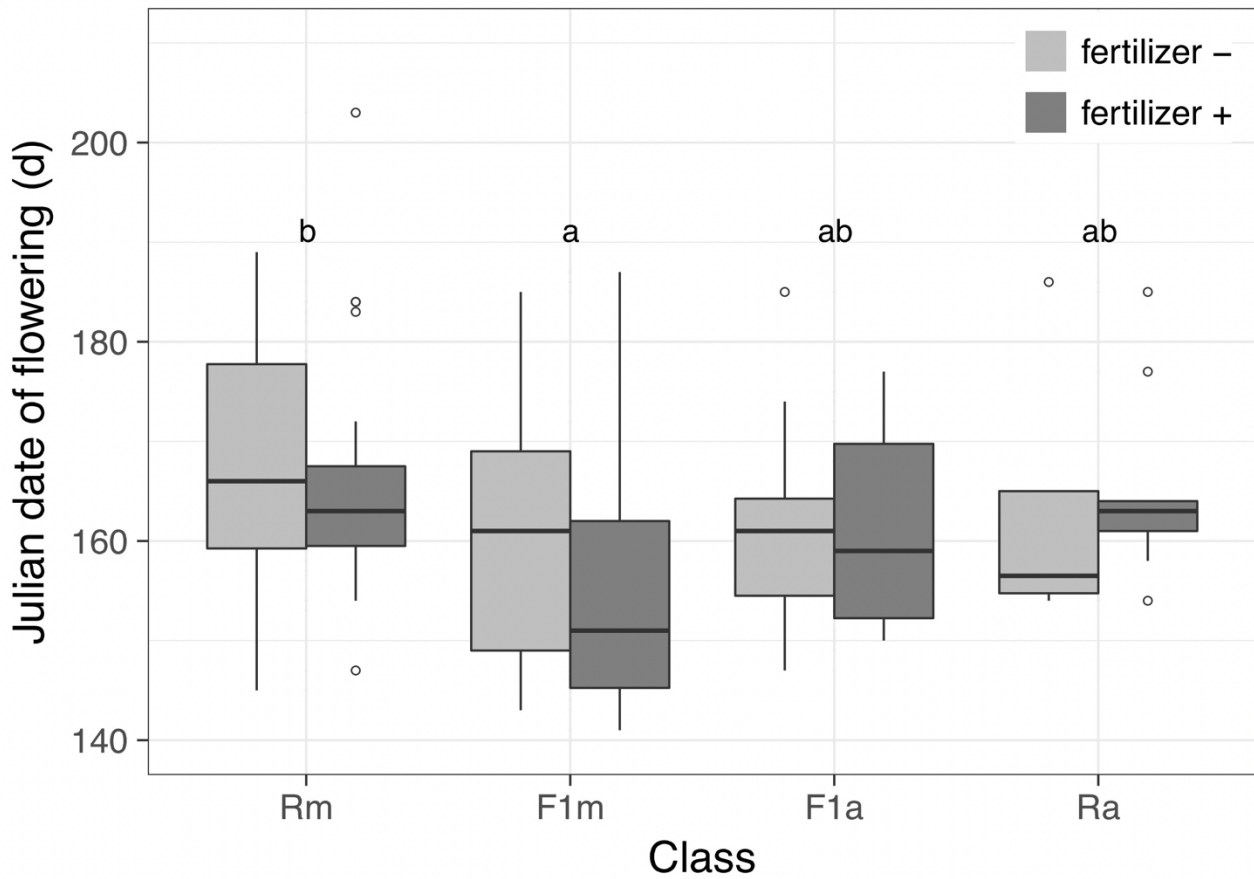

667

668 **Fig. 6.** Box and whisker plots for the date of flowering, given as the Julian date, for four classes  
669 (Rm: *Rhinanthus minor*, F1m:  $F_{1m}$  hybrids, F1a:  $F_{1a}$  hybrids, Ra: *Rhinanthus major*) and two fertilizer  
670 treatments. Boxes that share an identical letter did not differ significantly from each other in post-  
671 hoc Tukey tests.

672

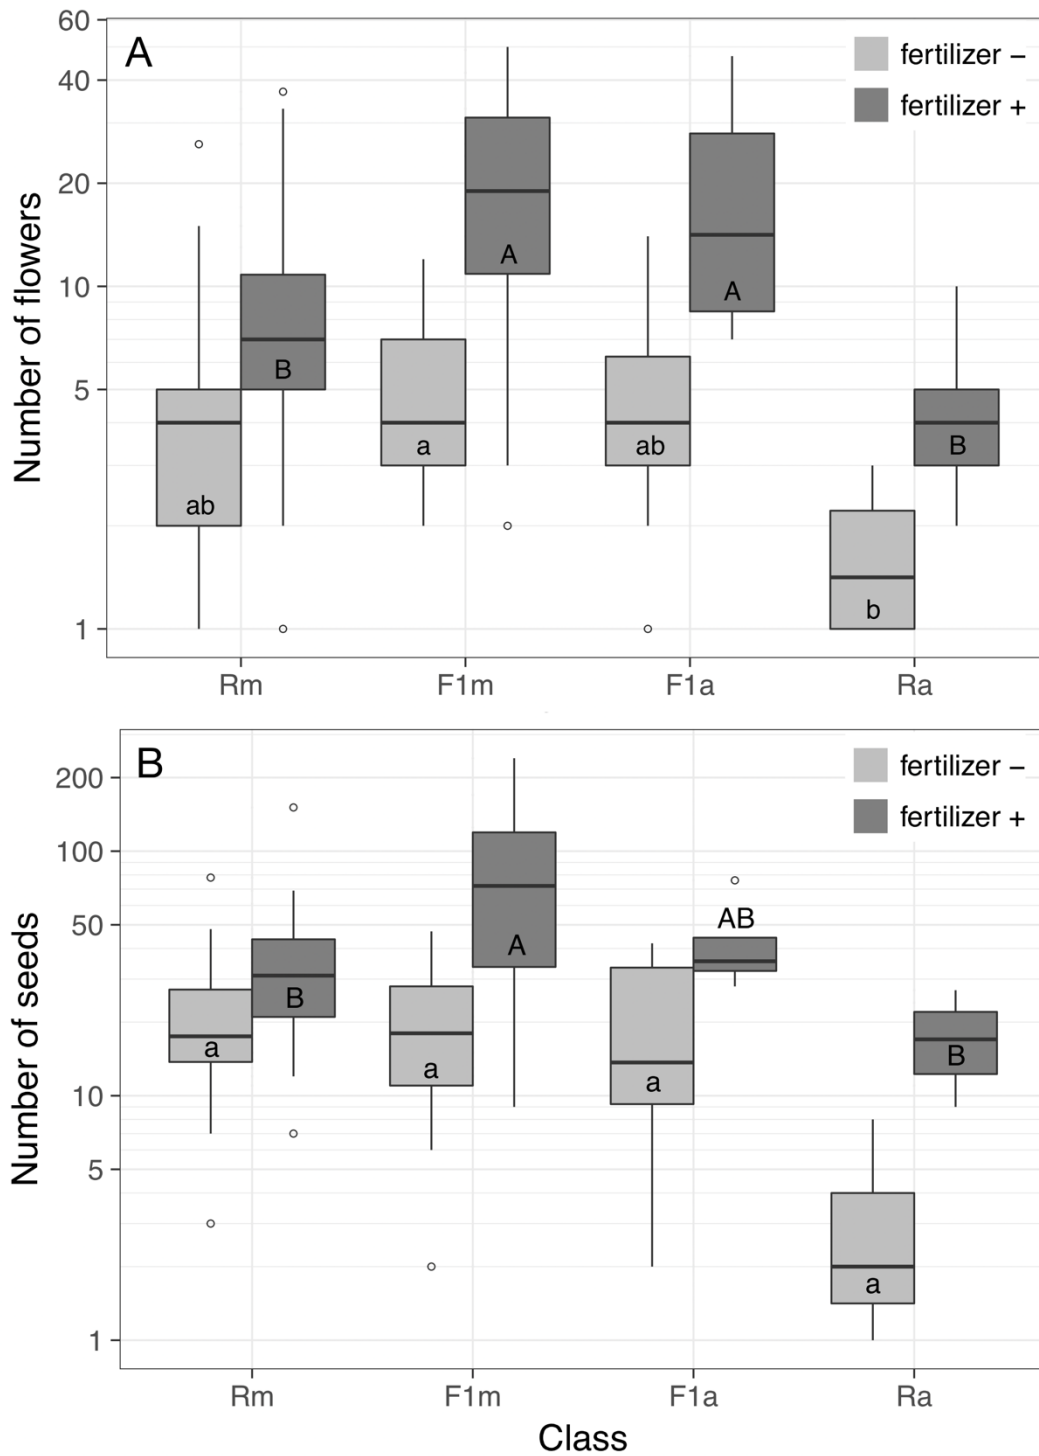

673

674 **Fig. 7.** Box and whisker plots for the total number of flowers produced (on a logarithmic scale) for  
675 four classes (Rm: *Rhinanthus minor*, F1m:  $F_{1m}$  hybrids, F1a:  $F_{1a}$  hybrids, Ra: *Rhinanthus major*) and  
676 two fertilizer treatments. Boxes that share an identical letter within each fertilizer treatment did not  
677 differ significantly from each other in post-hoc Tukey tests.

678
